# Supplementary material for: Stereoisomeric coordination polymers based on facial and meridional six-coordinate dysprosium(iii )
Source: Royal Society of Chemistry journal article supplement (doi:10.1039/d2dt00334a), 2022-01-01
Supplement: d2dt00334a1.pdf [file d2dt00334a1.pdf]

## Supporting information

### Stereoisomeric coordination polymers based on facial and meridional six-coordinate dysprosium(III)

Wei-Quan Lin,<sup>a</sup> Dan-Ru Wang,<sup>a</sup> Wei-Jian Long,<sup>a</sup> Li-Shan Lin,<sup>a</sup> Ze-Xian Tao,<sup>a</sup> Jun-Liang Liu,<sup>b</sup> Zhao-Qing Liu<sup>a</sup> and Ji-Dong Leng<sup>a\*</sup>

<sup>a</sup>School of Chemistry and Chemical Engineering/Institute of Clean Energy and Materials, Guangzhou University No. 230 Wai Huan Xi Road, Guangzhou Higher Education Mega Center, Guangzhou 510006 (P. R. China), E-mail: [jjdong.leng@gzhu.edu.cn](mailto:jjdong.leng@gzhu.edu.cn)

<sup>b</sup>Key Laboratory of Bioinorganic and Synthetic Chemistry of Ministry of Education, School of Chemistry, Sun Yat-Sen University, Guangzhou, 510275, P. R. China.

**Table S1.** Crystal data and structure refinement parameters for complexes **1-3**.

| Complex                                                                    | 1                                                                                                                                   | 2                                                                               | 3                                                                                                  |
|----------------------------------------------------------------------------|-------------------------------------------------------------------------------------------------------------------------------------|---------------------------------------------------------------------------------|----------------------------------------------------------------------------------------------------|
| <b>Empirical formula</b>                                                   | C <sub>39</sub> H <sub>36</sub> Cl <sub>3</sub> DyO <sub>3</sub> P <sub>3</sub> ·C <sub>1.75</sub> H <sub>7</sub> O <sub>1.75</sub> | C <sub>39</sub> H <sub>36</sub> Cl <sub>3</sub> DyO <sub>3</sub> P <sub>3</sub> | C <sub>156</sub> H <sub>144</sub> Cl <sub>12</sub> Dy <sub>4</sub> O <sub>12</sub> P <sub>12</sub> |
| <b>Formula weight</b>                                                      | 970.51                                                                                                                              | 914.44                                                                          | 3657.74                                                                                            |
| <b>Temperature / K</b>                                                     | 100.0(2)                                                                                                                            | 100.0 (2)                                                                       | 100.0 (2)                                                                                          |
| <b>Crystal system</b>                                                      | Triclinic                                                                                                                           | Triclinic                                                                       | Trigonal                                                                                           |
| <b>Space group</b>                                                         | <i>P</i> -1                                                                                                                         | <i>P</i> -1                                                                     | <i>R</i> -3                                                                                        |
| <b><i>a</i> / Å</b>                                                        | 12.7559(5)                                                                                                                          | 11.9254(1)                                                                      | 35.6799(2)                                                                                         |
| <b><i>b</i> / Å</b>                                                        | 13.5242(6)                                                                                                                          | 12.0637(1)                                                                      | 35.6799(2)                                                                                         |
| <b><i>c</i> / Å</b>                                                        | 14.6360(4)                                                                                                                          | 15.1295(1)                                                                      | 21.4215(1)                                                                                         |
| <b><math>\alpha</math> / °</b>                                             | 105.698(3)                                                                                                                          | 96.832(1)                                                                       | 90                                                                                                 |
| <b><math>\beta</math> / °</b>                                              | 97.442(3)                                                                                                                           | 98.582(1)                                                                       | 90                                                                                                 |
| <b><math>\gamma</math> / °</b>                                             | 115.579(4)                                                                                                                          | 115.438(1)                                                                      | 120                                                                                                |
| <b>Volume / Å<sup>3</sup></b>                                              | 2102.43(15)                                                                                                                         | 1902.29(3)                                                                      | 23617.2(3)                                                                                         |
| <b><i>Z</i></b>                                                            | 2                                                                                                                                   | 2                                                                               | 6                                                                                                  |
| <b>Density / g·cm<sup>-3</sup></b>                                         | 1.533                                                                                                                               | 1.596                                                                           | 1.543                                                                                              |
| <b><math>\mu</math> / mm<sup>-1</sup></b>                                  | 2.123                                                                                                                               | 13.931                                                                          | 13.465                                                                                             |
| <b><i>F</i>(000)</b>                                                       | 975.0                                                                                                                               | 912.0                                                                           | 10944.0                                                                                            |
| <b>Radiation</b>                                                           | Mo K $\alpha$<br>( $\lambda$ = 0.71073 Å)                                                                                           | Cu K $\alpha$<br>( $\lambda$ = 1.54184 Å)                                       | Cu K $\alpha$<br>( $\lambda$ = 1.54184 Å)                                                          |
| <b>2<math>\theta</math> range for data collection / °</b>                  | 4.05 to 59.178                                                                                                                      | 6.036 to 152.91                                                                 | 4.954 to 153.8                                                                                     |
| <b>Reflections collected</b>                                               | 37423                                                                                                                               | 46309                                                                           | 28652                                                                                              |
| <b>Independent reflections</b>                                             | 10482 [ <i>R</i> <sub>int</sub> = 0.0664, <i>R</i> <sub>sigma</sub> = 0.0801]                                                       | 7672 [ <i>R</i> <sub>int</sub> = 0.0622, <i>R</i> <sub>sigma</sub> = 0.0292]    | 10478 [ <i>R</i> <sub>int</sub> = 0.0211, <i>R</i> <sub>sigma</sub> = 0.0220]                      |
| <b>Goodness-of-fit on <i>F</i><sup>2</sup></b>                             | 1.057                                                                                                                               | 1.062                                                                           | 1.050                                                                                              |
| <b>Final <i>R</i> indexes [<i>I</i> ≥ 2<math>\sigma</math> (<i>I</i>)]</b> | <i>R</i> <sub>1</sub> = 0.0499<br><i>wR</i> <sub>2</sub> = 0.1090                                                                   | <i>R</i> <sub>1</sub> = 0.0313<br><i>wR</i> <sub>2</sub> = 0.0843               | <i>R</i> <sub>1</sub> = 0.0495<br><i>wR</i> <sub>2</sub> = 0.1190                                  |

|                                   |                                   |                                   |                                   |
|-----------------------------------|-----------------------------------|-----------------------------------|-----------------------------------|
| <b>Final R indexes [all data]</b> | $R_1 = 0.0674$<br>$wR_2 = 0.1199$ | $R_1 = 0.0339$<br>$wR_2 = 0.0865$ | $R_1 = 0.0510$<br>$wR_2 = 0.1200$ |
|-----------------------------------|-----------------------------------|-----------------------------------|-----------------------------------|

**Table S2.** Selected bond lengths (Å) and angles (°) for complexes **1-3**.

| <b>1</b>             |            | <b>2</b>                                 |            |
|----------------------|------------|------------------------------------------|------------|
| Dy1-Cl1              | 2.6584(12) | Dy1-Cl1                                  | 2.6176(8)  |
| Dy1-Cl2              | 2.5978(15) | Dy1-Cl2                                  | 2.6484(7)  |
| Dy1-Cl3              | 2.6697(12) | Dy1-Cl3                                  | 2.6234(9)  |
| Dy1-O1               | 2.233(4)   | Dy1-O1                                   | 2.243(2)   |
| Dy1-O2               | 2.225(4)   | Dy1-O2                                   | 2.276(2)   |
| Dy1-O3               | 2.271(4)   | Dy1-O3                                   | 2.272(2)   |
| Cl1-Dy1-Cl2          | 94.06(4)   | Cl1-Dy1-Cl2                              | 94.41(2)   |
| Cl1-Dy1-O2           | 90.66(8)   | Cl1-Dy1-O2                               | 174.85(6)  |
| Cl2-Dy1-O1           | 92.37(11)  | Cl2-Dy1-O1                               | 86.55(6)   |
| Cl3-Dy1-O1           | 90.65(8)   | Cl3-Dy1-O1                               | 175.95(6)  |
| O1-Dy1-O2            | 177.71(11) | O1-Dy1-O2                                | 87.51(8)   |
| Cl1-Dy1-Cl3          | 172.59(5)  | Cl1-Dy1-Cl3                              | 96.06(3)   |
| Cl1-Dy1-O3           | 87.49(8)   | Cl1-Dy1-O3                               | 92.28(5)   |
| Cl2-Dy1-O2           | 87.14(11)  | Cl2-Dy1-O2                               | 87.63(5)   |
| Cl3-Dy1-O2           | 91.61(8)   | Cl3-Dy1-O2                               | 88.51(6)   |
| O1-Dy1-O3            | 93.84(14)  | O1-Dy1-O3                                | 86.99(8)   |
| Cl1-Dy1-O1           | 87.15(8)   | Cl1-Dy1-O1                               | 87.89(6)   |
| Cl2-Dy1-Cl3          | 93.10(4)   | Cl2-Dy1-Cl3                              | 94.03(2)   |
| Cl2-Dy1-O3           | 173.67(10) | Cl2-Dy1-O3                               | 170.52(6)  |
| Cl3-Dy1-O3           | 85.60(8)   | Cl3-Dy1-O3                               | 91.94(6)   |
| O2-Dy1-O3            | 86.71(14)  | O2-Dy1-O3                                | 85.17(7)   |
| <b>Dy1(mer) of 3</b> |            | <b>Dy2(fac) of 3</b>                     |            |
| Dy1-Cl1              | 2.6322(18) | Dy2-Cl4                                  | 2.6214(11) |
| Dy1-Cl2              | 2.6126(14) | Dy2-Cl4 <sup>#2</sup>                    | 2.6214(13) |
| Dy1-Cl3              | 2.6508(17) | Dy2-Cl4 <sup>#1</sup>                    | 2.6214(12) |
| Dy1-O1               | 2.252(3)   | Dy2-O4                                   | 2.273(3)   |
| Dy1-O2               | 2.233(4)   | Dy2-O4 <sup>#2</sup>                     | 2.273(4)   |
| Dy1-O3               | 2.232(3)   | Dy2-O4 <sup>#1</sup>                     | 2.273(4)   |
| Cl2-Dy1-O1           | 96.14(10)  | Cl4 <sup>#2</sup> -Dy2-Cl4 <sup>#1</sup> | 94.47(4)   |
| Cl2-Dy1-O1           | 96.14(10)  | Cl4 <sup>#2</sup> -Dy2-O4 <sup>#2</sup>  | 82.58(10)  |
| Cl2-Dy1-O2           | 174.59(10) | Cl4 <sup>#2</sup> -Dy2-O4 <sup>#1</sup>  | 167.09(10) |
| Cl2-Dy1-O2           | 174.59(10) | Cl4 <sup>#1</sup> -Dy2-O4 <sup>#1</sup>  | 82.58(9)   |
| Cl2-Dy1-O3           | 83.68(8)   | Cl4-Dy2-Cl4 <sup>#2</sup>                | 94.47(4)   |
| Cl2-Dy1-O3           | 83.68(8)   | Cl4-Dy2-Cl4 <sup>#1</sup>                | 94.47(4)   |
| Cl3-Dy1-O1           | 88.10(12)  | Cl4-Dy2-O4                               | 82.58(9)   |
| Cl3-Dy1-O1           | 88.10(12)  | Cl4-Dy2-O4 <sup>#2</sup>                 | 167.09(10) |
| Cl3-Dy1-O2           | 83.66(12)  | Cl4-Dy2-O4 <sup>#1</sup>                 | 98.28(10)  |
| Cl3-Dy1-O2           | 83.66(12)  | O4 <sup>#2</sup> -Dy2-Cl4 <sup>#1</sup>  | 98.28(10)  |
| Cl3-Dy1-O3           | 90.90(10)  | O4 <sup>#2</sup> -Dy2-O4 <sup>#1</sup>   | 85.40(14)  |

|            |            |                          |            |
|------------|------------|--------------------------|------------|
| Cl3-Dy1-O3 | 90.90(10)  | O4-Dy2-Cl4 <sup>#2</sup> | 98.28(10)  |
| O1-Dy1-O2  | 88.98(13)  | O4-Dy2-Cl4 <sup>#1</sup> | 167.09(10) |
| O1-Dy1-O3  | 178.96(15) | O4-Dy2-O4 <sup>#2</sup>  | 85.40(13)  |
| O2-Dy1-O3  | 91.18(12)  | O4-Dy2-O4 <sup>#1</sup>  | 85.40(13)  |

Symmetry code, <sup>#1</sup>:  $-x + y, 1 - x, z$ ; <sup>#2</sup>:  $1 - y, 1 + x - y, z$

**Table S3.** Continuous Shape Measures Calculations<sup>1</sup> results for Dy ions of **1-3**.

|        | Ideal structures                         | <b>1</b> (mer) | <b>2</b> (fac) | Dy1 (mer) of <b>3</b> | Dy2 (fac) of <b>3</b> |
|--------|------------------------------------------|----------------|----------------|-----------------------|-----------------------|
| HP-6   | $D_{6h}$ Hexagon                         | 33.52001       | 32.65284       | 31.71937              | 34.41366              |
| PPY-6  | $C_{5v}$ Pentagonal pyramid              | 27.97370       | 28.27465       | 27.75832              | 24.88369              |
| OC-6   | $O_h$ Octahedron                         | 0.94148        | 0.88748        | 0.99352               | 1.75440               |
| TPR-6  | $D_{3h}$ Trigonal prism                  | 14.69981       | 16.38556       | 15.42735              | 11.30731              |
| JPPY-5 | $C_{5v}$ Johnson pentagonal pyramid (J2) | 30.58340       | 32.19463       | 30.52598              | 29.32199              |

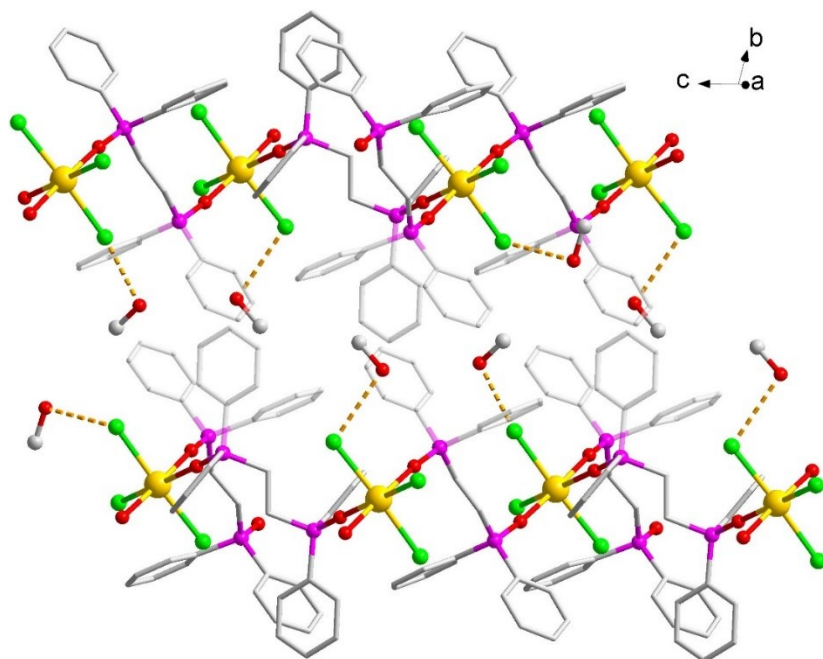

**Figure S1.** O-H...Cl hydrogen bonds in complex **1** among MeOH molecules and the 2D-layers.

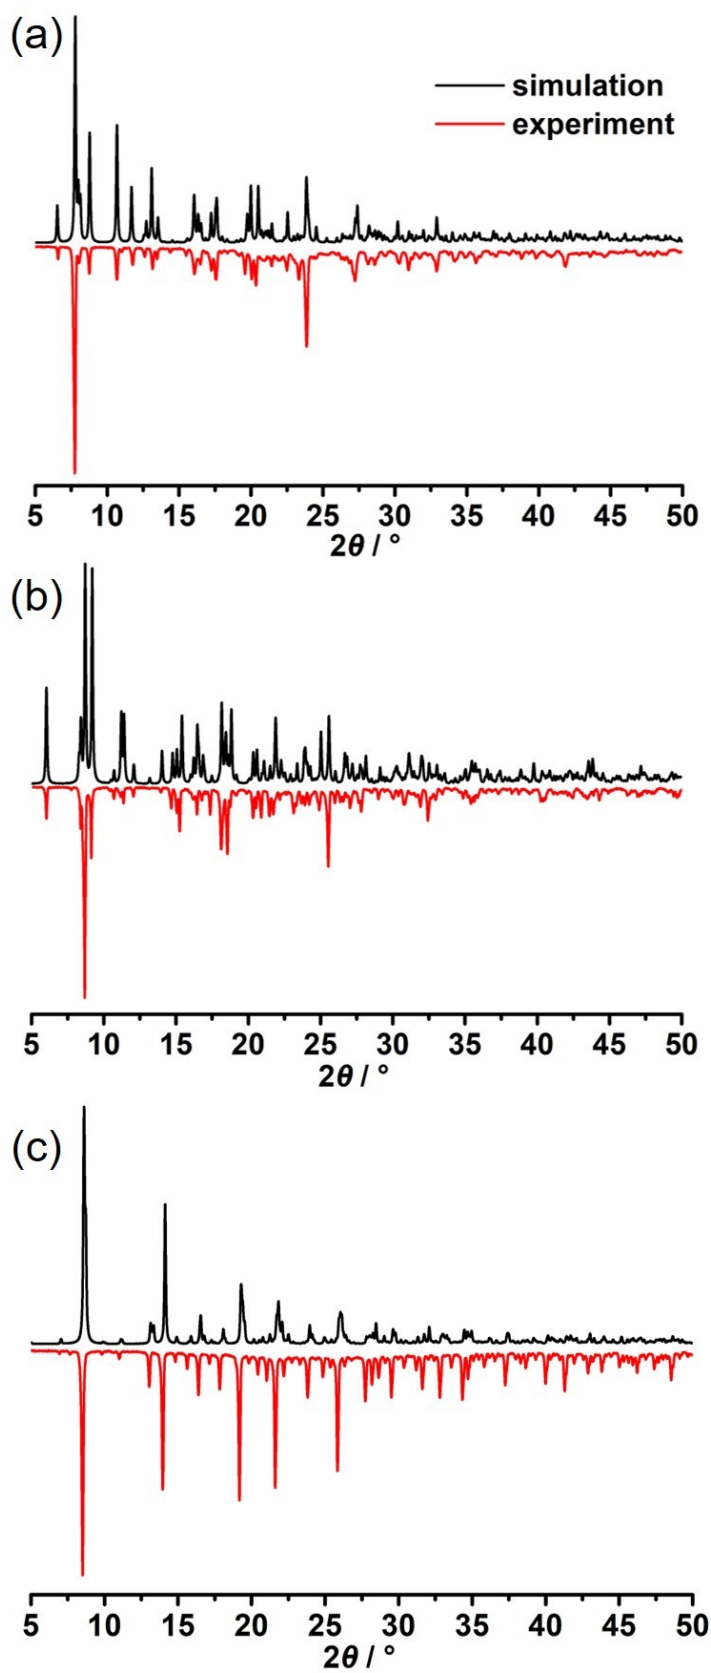

**Figure S2.** Experimental (red) and simulated (black) powder X-ray diffraction patterns of complexes **1(a)**, **2(b)** and **3(c)**.

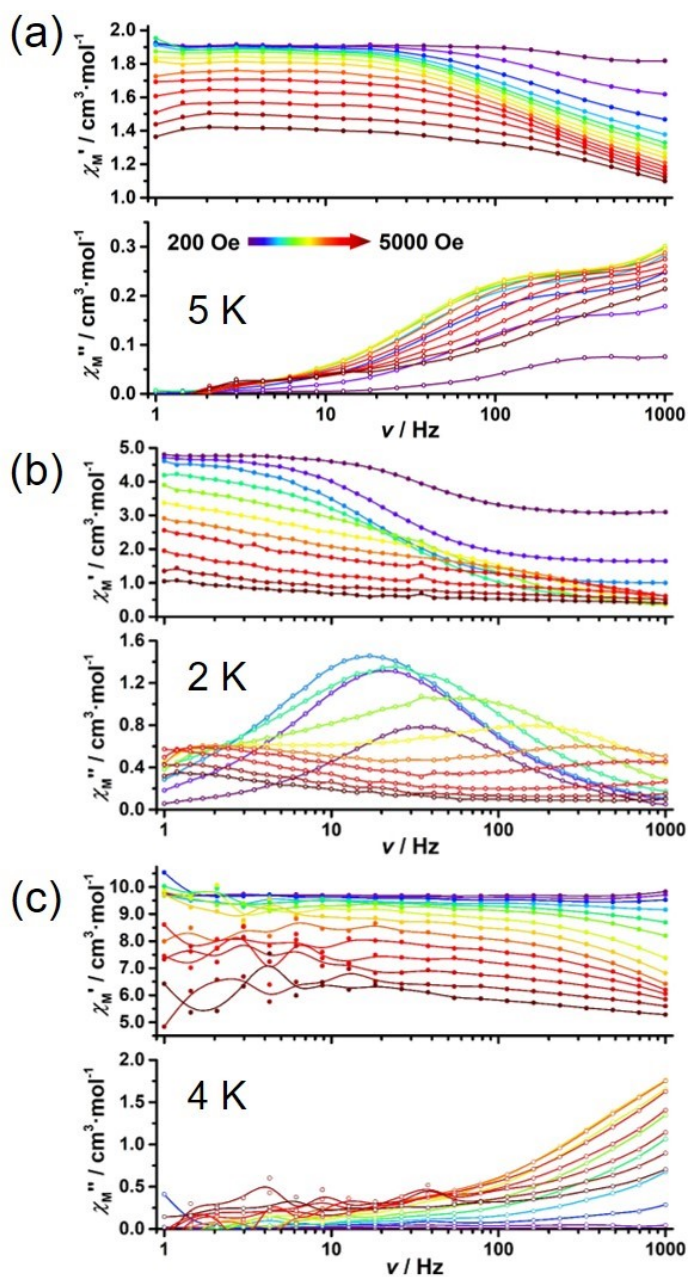

**Figure S3.** Frequency dependent in-phase ( $\chi_M'$ , solid circles) and out-of-phase ( $\chi_M''$ , open circles) ac magnetic susceptibility for complex **1** (a), **2** (b) and **3** (c) under various dc fields at indicated temperatures. The chromatic solid lines represent the fitting results using generalized Debye model. The obtained optimal dc fields are 1600 Oe for **1**, 600 Oe for **2**, and 2000 Oe for **3**, respectively.

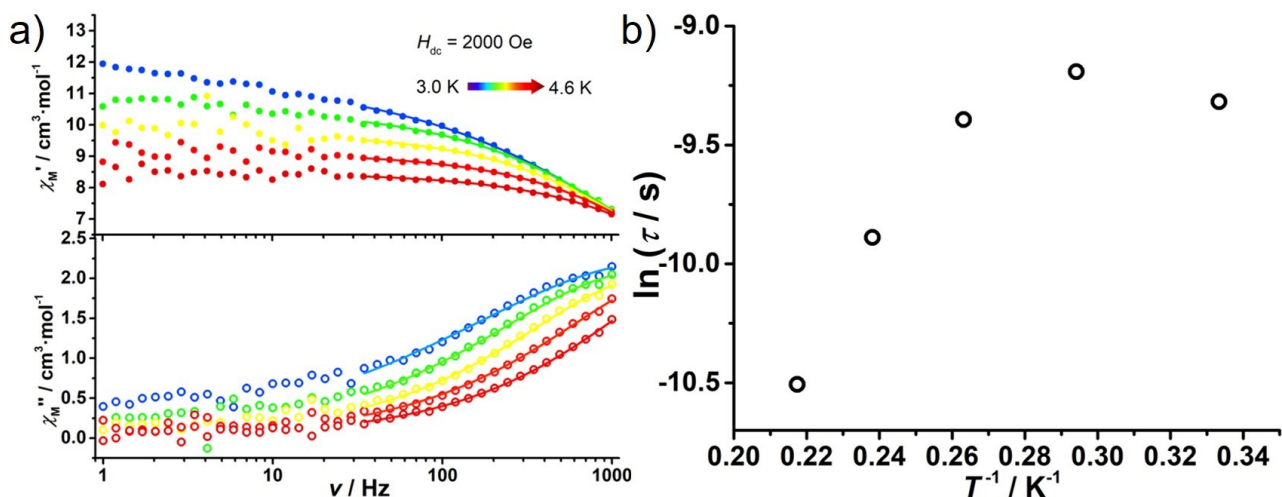

**Figure S4.** Frequency dependent in-phase ( $\chi'_M$ , solid circles) and out-of-phase ( $\chi''_M$ , open circles) ac magnetic susceptibility plots under a dc field of 2000 Oe, and temperature dependent relaxation time, for complex **3**. The circles and lines represent the experimental data and the fitting results, respectively. Although no peak of  $\chi''_M$  can be observed under an external 2 kOe dc field, the relaxation times was extracted by fitting high-frequency section by modified Debye model.

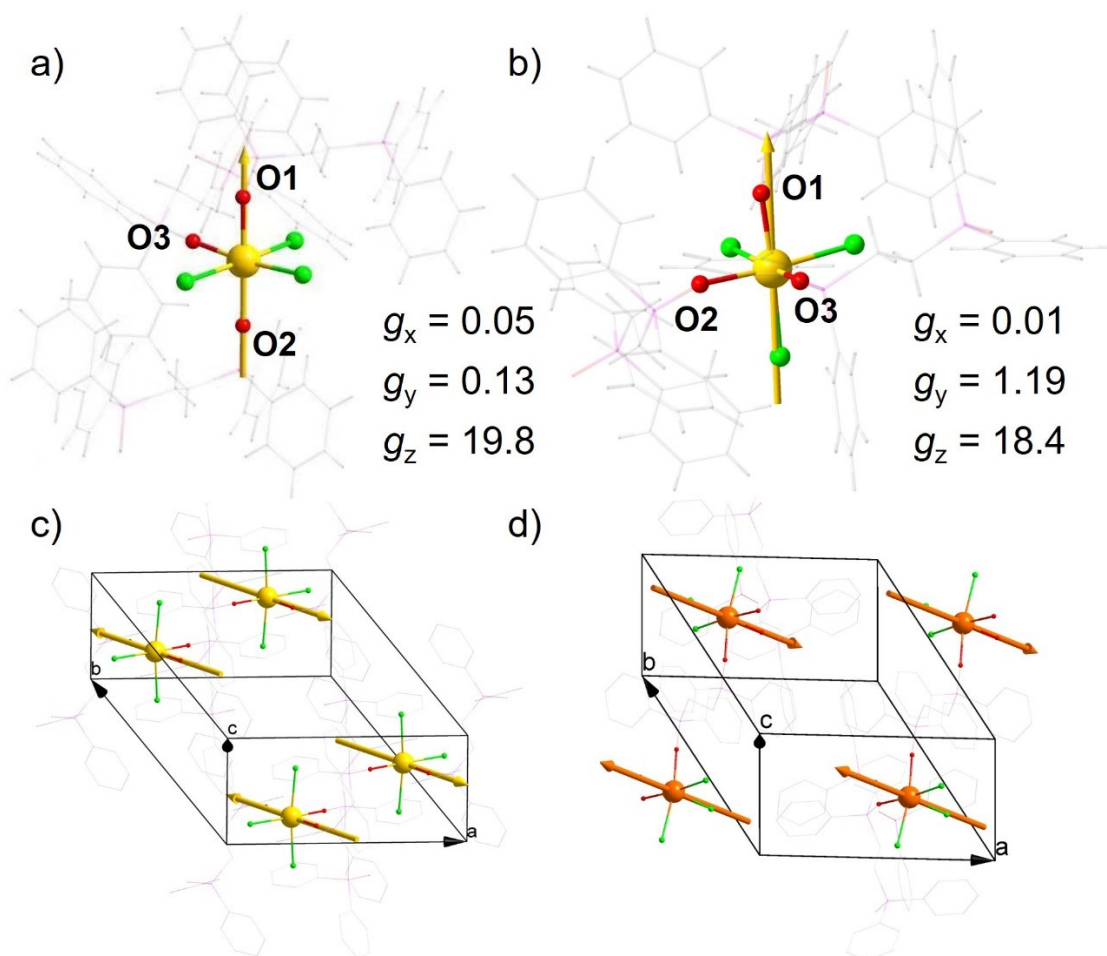

**Figure S5.** Orientation of the  $g_z$ -tensors of the ground state KDs for the Dy(III) ions in a single molecule (a for **1** and b for **2**) and in one unit cell (c for **1** and d for **2**). The ligands are transparented for clarity. The orientation of

the  $g_z$ -tensors for the Dy(III) ions in one unit cell is centrosymmetric because the nature the  $P-1$  space group.

**Table S4.** CASSCF computed spin-free state energies for complex **1** and **2**.

| Spin-free State Energies (cm <sup>-1</sup> ) for <b>1</b> | Spin-free State Energies (cm <sup>-1</sup> ) for <b>2</b> |
|-----------------------------------------------------------|-----------------------------------------------------------|
| 0                                                         | 0                                                         |
| 15.53664                                                  | 10.81137                                                  |
| 98.70651                                                  | 32.86216                                                  |
| 238.46053                                                 | 237.04643                                                 |
| 395.22636                                                 | 266.26262                                                 |
| 401.88892                                                 | 296.64506                                                 |
| 441.11442                                                 | 379.41457                                                 |
| 491.84062                                                 | 436.1085                                                  |
| 550.68513                                                 | 442.71902                                                 |
| 581.22303                                                 | 504.99708                                                 |
| 629.90638                                                 | 515.26477                                                 |
| 7635.1648                                                 | 7600.43584                                                |
| 7682.3591                                                 | 7629.05551                                                |
| 7738.54179                                                | 7635.98922                                                |
| 7850.28529                                                | 7790.26221                                                |
| 7866.00108                                                | 7794.36233                                                |
| 7887.38704                                                | 7806.28239                                                |
| 7998.34004                                                | 7925.82981                                                |
| 34915.63105                                               | 34960.48018                                               |
| 35076.72608                                               | 35051.00587                                               |
| 35307.04338                                               | 35089.96672                                               |

**Table S5.** Calculated energy (cm<sup>-1</sup>) and  $g$ -tensors of the lowest five Kramers doublets (KDs) for **1** and **2**.

| KD | <b>1</b>     |         | <b>2</b> |              |        |
|----|--------------|---------|----------|--------------|--------|
|    | $g$ -tensors | energy  | $g$      | $g$ -tensors | energy |
| 1  | $g_x$        | 0.05064 | 0        | $g_x$        | 0.0099 |
|    | $g_y$        | 0.13143 |          | $g_y$        | 1.1875 |
|    | $g_z$        | 19.7715 |          | $g_z$        | 18.412 |
| 2  | $g_x$        | 0.8975  | 117.10   | $g_x$        | 0.3308 |
|    | $g_y$        | 0.9673  |          | $g_y$        | 1.2980 |
|    | $g_z$        | 18.785  |          | $g_z$        | 17.298 |
| 3  | $g_x$        | 1.5915  | 207.62   | $g_x$        | 0.6254 |
|    | $g_y$        | 2.7529  |          | $g_y$        | 1.2452 |
|    | $g_z$        | 13.632  |          | $g_z$        | 17.792 |
| 4  | $g_x$        | 3.4672  | 269.42   | $g_x$        | 8.2308 |
|    | $g_y$        | 6.0692  |          | $g_y$        | 7.6128 |
|    | $g_z$        | 12.704  |          | $g_z$        | 5.9795 |
| 5  | $g_x$        | 2.8717  | 382.32   | $g_x$        | 3.1135 |
|    | $g_y$        | 4.0507  |          | $g_y$        | 5.0209 |
|    | $g_z$        | 11.568  |          | $g_z$        | 7.3012 |

**Table S6.** The transversal magnetic moment values of the lowest three KDs for **1** and **2**.

| <b>1</b> |        | <b>2</b> |        |
|----------|--------|----------|--------|
| 1+ → 1-  | 0.0303 | 1+ → 1-  | 0.1996 |
| 1+ → 2+  | 0.8081 | 1+ → 2+  | 1.6294 |
| 1+ → 2-  | 0.3884 | 1+ → 2-  | 0.9323 |
| 1+ → 3+  | 1.5951 | 1+ → 3+  | 0.9856 |
| 1+ → 3-  | 0.0620 | 1+ → 3-  | 0.7514 |
| 2+ → 2-  | 2.3146 | 2+ → 2-  | 0.5022 |
| 2+ → 3+  | 1.3688 | 2+ → 3+  | 0.5333 |
| 2+ → 3-  | 1.1911 | 2+ → 3-  | 0.6324 |
| 3+ → 3-  | 0.7251 | 3+ → 3-  | 2.8876 |

**Table S7.** Wave functions with definite projection of the total moment  $|m_J\rangle$  of the lowest three doublets for **1** and **2**.

| <b>KDs</b> |   | <b>Wave functions</b>                                                                                 |
|------------|---|-------------------------------------------------------------------------------------------------------|
| <b>1</b>   | 1 | 98.3% $ \pm 15/2\rangle$                                                                              |
|            | 2 | 44.0% $ \pm 1/2\rangle$ + 25.6% $ \pm 3/2\rangle$ + 14.0% $ \pm 5/2\rangle$ + 5.5% $ \pm 13/2\rangle$ |
|            | 3 | 78.7% $ \pm 13/2\rangle$ + 7.1% $ \pm 5/2\rangle$ + 5.8% $ \pm 1/2\rangle$ + 5.0% $ \pm 3/2\rangle$   |
| <b>2</b>   | 1 | 88.8% $ \pm 15/2\rangle$ + 4.0% $ \pm 7/2\rangle$                                                     |
|            | 2 | 42.2% $ \pm 1/2\rangle$ + 23.5% $ \pm 3/2\rangle$ + 13.0% $ \pm 5/2\rangle$ + 6.4% $ \pm 15/2\rangle$ |
|            | 3 | 36.8% $ \pm 1/2\rangle$ + 29.1% $ \pm 3/2\rangle$ + 15.3% $ \pm 5/2\rangle$ + 7.4% $ \pm 13/2\rangle$ |

1. S. Alvarez, P. Alemany, D. Casanova, J. Cirera, M. Llonell and D. Avnir, Shape maps and polyhedral interconversion paths in transition metal chemistry, *Coord. Chem. Rev.*, 2005, **249**, 1693–1708.
